# Supplementary material for: Infiltration of COX-2–expressing macrophages is a prerequisite for IL-1β–induced neovascularization and tumor growth
Source: JCI journal article supplement (doi:10.1172/jci23298), 2005-10-26
Supplement: sd1 [file 1]

Supplemental Figure S1

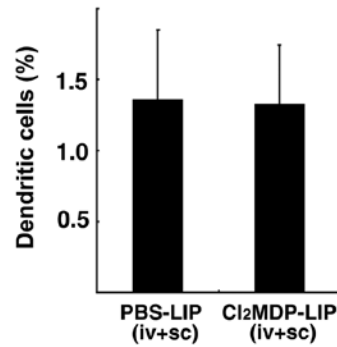

Supplemental Figure S2

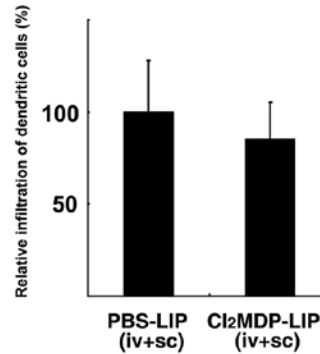

### Supplemental Figure legends

**Figure S1.** FACS analysis of CD11c<sup>+</sup> dendritic cells in peripheral blood. FACS analysis was carried out on the peripheral blood of BALB/c mice on day 2 after iv + sc administration of CL<sub>2</sub>MDP-LIPs (n=6) or PBS-LIPs (n=6). Dendritic cells were stained with PE-CD11c mAb. The percentages of dendritic cells were 1.3±0.4% (CL<sub>2</sub>MDP-LIPs treatment) and 1.4±0.5% (PBS-LIPs treatment).

**Figure S2.** FACS analysis of CD11c<sup>+</sup> dendritic cells in corneas. FACS analysis was carried out on infiltrating cells obtained from the five IL-1β-implanted corneas on day 4 in BALB/c mice that received CL<sub>2</sub>MDP-LIPs or PBS-LIPs iv and/or sc. Dendritic cells were stained with PE-CD11c mAb. Comparison of percentages of CD11c<sup>+</sup> dendritic cells in IL-1β-implanted corneas with CL<sub>2</sub>MDP-LIPs (n=4) or PBS-LIPs treatment (n=3).
